# Supplementary material
Source: Springer Nature journal article supplement (https://www.springermedizin.de/resource/supplementary/12889_2012_4171_MOESM1_ESM.pdf/9491442)
Supplement: MOESM1 [file 9491442]

Table 1: Coding guide and sample coded text

| Code                       | Definition                                                                                                | Sample Text                                                                                                                                                                                                         |
|----------------------------|-----------------------------------------------------------------------------------------------------------|---------------------------------------------------------------------------------------------------------------------------------------------------------------------------------------------------------------------|
| Barriers                   | Challenges or obstacles encountered by the participant                                                    | <i>“I think it can be overwhelming to think about how much you have to bring in to solving a problem”</i>                                                                                                           |
| Crossing Sectors and Silos | Practices or approaches that cross boundaries/jurisdictions of sectors, organizations, or other silos     | <i>“I would say that each project has a core group of stakeholders – that group of stakeholders is rarely within the context of one discipline or one sector”</i>                                                   |
| Environment                | Discussion of the environment - defining it, environmental health issues, its connection to public health | <i>“It’s kind of a systems focus on how changing one piece changes all of those nested hierarchies of environments that are sitting within each other”</i>                                                          |
| Equity                     | Discussion of issues of equity especially around health                                                   | <i>“Photovoice was a really powerful way of hearing the most vulnerable within our community. And really engaging them as well. Not just hearing them but helping them to develop skills and advocacy”</i>          |
| Governance                 | Discussion of current and possible models of governance, and their implications to public health          | <i>“So there are a lot of times, as a community our hands are tied [...] So sometimes we can’t do anything because of bureaucracy”</i>                                                                              |
| Health                     | Discussion of health - defining it, important health issues                                               | <i>“if we’re focusing on human health and well-being, often we forget about broader ecosystem and ecological issues [...] sustainability issues, energy”</i>                                                        |
| Important Need             | An identified need or important issue for public health practice                                          | <i>“a real recognition that we need to reach out to stakeholders and other jurisdictions if we have a broader systems based approach and learn how to work with them and learn how to bring them into the tent”</i> |
| Indicators                 | Discussion around measurement tools or indicators for health                                              | <i>“People across North America have been struggling with this idea about how do you develop indicators for a so-called healthy</i>                                                                                 |

|                             |                                                                                                                                                                          |                                                                                                                                                                                                                                                                                                  |
|-----------------------------|--------------------------------------------------------------------------------------------------------------------------------------------------------------------------|--------------------------------------------------------------------------------------------------------------------------------------------------------------------------------------------------------------------------------------------------------------------------------------------------|
|                             |                                                                                                                                                                          | <i>food system or community food security”</i>                                                                                                                                                                                                                                                   |
| Methods                     | Discussion of innovative or interesting approaches in public health                                                                                                      | <i>“deliberative policy analysis [...] it’s the idea that through reflection and deliberation on policy issues, we actually develop some policy learning and that’s what can move change forward”</i>                                                                                            |
| Participatory Approaches    | Discussion of participatory approaches in public health practice. Also includes peer research, community-based research, community engagement and community involvement. | <i>“Community engagement - how do we have those conversations with community members for them to understand and be a part of this process?”</i>                                                                                                                                                  |
| Perspectives, Context       | Discussion of other perspectives or other contexts, and their role in public health.                                                                                     | <i>“What we’re really trying to do is to have those sectors that we haven’t traditionally partnered with. I think traditionally [...] we’ve had like-minded people at the table and so those people who have a different point of view from us, not necessarily are we hearing their voices”</i> |
| Support System              | Support systems or facilitators for the work of the participant.                                                                                                         | <i>“There’s been lots of support definitely within the community”</i>                                                                                                                                                                                                                            |
| Sustainability              | Discussion of sustainability, self-sustaining systems, or visioning for the future.                                                                                      | <i>“So what are we doing to our biophysical environment both in terms of resource use, resource extraction? So how much are we consuming that we are taking away from future generations?”</i>                                                                                                   |
| Systems Thinking            | Consideration of smaller/larger systems, drawing connections, recognizing nested scales                                                                                  | <i>“a broader understanding that if you’re thinking from an ecosystem perspective, if you’re changing something in any of those environments, it’s going to affect what’s happening in the others”</i>                                                                                           |
| Inter- or Transdisciplinary | Practices which engage multiple disciplines and/or transcends disciplinary thinking to explore                                                                           | <i>“It’s a wide variety of evidence. It’s qualitative and quantitative. It’s peer-reviewed literature but also policy literature</i>                                                                                                                                                             |

|           |                                                  |                                                                                                                                        |
|-----------|--------------------------------------------------|----------------------------------------------------------------------------------------------------------------------------------------|
| Practices | different types of knowledge and ways of knowing | <i>[...], it includes stakeholder perspectives on the issue, it includes gathering evidence about the experience of jurisdictions“</i> |
|-----------|--------------------------------------------------|----------------------------------------------------------------------------------------------------------------------------------------|
